# Supplementary material for: The evolution of the type VI secretion system as a disintegration weapon
Source: PLoS Biol. 2020 May 26;18(5):e3000720. doi: 10.1371/journal.pbio.3000720 (PMC7274471; doi:10.1371/journal.pbio.3000720)
Supplement: S1 Table — (XLSX) [file pbio.3000720.s016.xlsx]

## Sheet: Sheet1
S1 Table: Model parameters
Category	Parameter	Symbol	Value(s)	Units	Source
Cell-based	Max. specific growth rate	k_grow	1	h^-1	[1]
	Pro rata T6SS cost	c	[0-0.05]	1 / (firings cell^-1 h^-1)	This study
	T6SS firing rate	k_fire	[0-250.0]	firings cell^-1 h^-1	Estimated from [2]
	Lysis delay	1 / k_lysis	[0.125-1.25]	h	This study
	Lethal hit threshold	N_hits	1	-	Estimated from [2]
	Extracellular needle length	L_needle	0.5	µm	Estimated from [3]
	Min. needle penetration for hit	L_penetration	10	nm	Estimated from bacterial outer membrane width
	Cell radius	R	0.5	µm	Estimated from [2]
	Cell volume at birth	V_0	1.16	µm3	[4]
	Cell division volume noise	η_division	9	%	[4]
	Cell division orientation noise	η_orientation	0.2	%	[4]
Numerical	Simulation timestep	dt	0.025	h	[1]
	Cell / needle sorting grid element size	h	10	µm	[4]
	CG absolute tolerance	𝝐_CG	0.001	-	[1]
	Max. contact iterations	M_Iter, max	8	-	[1]
Mechanical	Regularization weight	ɑ	0.04 (0.1 for chambers)	-	[4]
	Growth restriction factor	1 / ɣ	0.002 (0.1 for chambers)	-	[4]
References
1. Rudge, T. J., Steiner, P. J., Phillips, A. & Haseloff, J. Computational Modeling of Synthetic Microbial Biofilms. ACS Synth. Biol. 1, 345–352 (2012).
2. Ringel, P. D., Hu, D. & Basler, M. The Role of Type VI Secretion System Effectors in Target Cell Lysis and Subsequent Horizontal Gene Transfer. Cell Rep. 21, 3927–3940 (2017).
3. Basler, M., Pilhofer, M., Henderson, G. P., Jensen, G. J. & Mekalanos, J. J. Type VI secretion requires a dynamic contractile phage tail-like structure. Nature 483, (2012).
4. Smith, W. P. J. et al. Cell morphology drives spatial patterning in microbial communities. Proc. Natl. Acad. Sci. E280–E286 (2016). doi:10.1073/pnas.1613007114
